# Supplementary material for: High Versus Low Adherence to the Mediterranean Diet for Prevention of Diabetes Mellitus Type 2: A Systematic Review and Meta-Analysis
Source: MDPI journal article supplement (doi:10.3390/metabo13070779), 2023-06-22
Supplement: s1 [file s1]

## **High versus low adherence to the Mediterranean Diet for prevention of diabetes mellitus type 2: A systematic review and meta-analysis.**

Evangelia Kotzakioulafi<sup>1</sup>, Dimitra Rafailia Bakaloudi<sup>1,2</sup>, Lydia Chrysoula<sup>1</sup>, Xenophon Theodoridis<sup>1</sup>, Christina Antza<sup>3</sup>, Ilias Tirodimos<sup>1</sup>, Michail Chourdakis<sup>1</sup>

### **Supplementary material**

#### Full search strategy

PubMed database (<https://pubmed.ncbi.nlm.nih.gov>)

“(Mediterranean diet) AND (Adherence)” Sort by: Publication Date

("diet, mediterranean"[MeSH Terms] OR ("diet"[All Fields] AND "mediterranean"[All Fields]) OR "mediterranean diet"[All Fields] OR ("mediterranean"[All Fields] AND "diet"[All Fields])) AND ("adherence"[All Fields] OR "adhere"[All Fields] OR "adhered"[All Fields] OR "adherence"[All Fields] OR "adherences"[All Fields] OR "adherent"[All Fields] OR "adherents"[All Fields] OR "adherer"[All Fields] OR "adherers"[All Fields] OR "adheres"[All Fields] OR "adhering"[All Fields]).

Scopus database (<https://www.scopus.com/home.uri>)

TIT-ABST-KEYWORDS: (“Mediterranean diet” AND Adherence)

Web of Science database ([www.webofknowledge.com](http://www.webofknowledge.com) )

(“Mediterranean diet” AND Adherence) (ALL FIELDS)

EMBASE database (<https://www.embase.com/> )

(Mediterranean diet and adherence).mp. [mp=title, abstract, heading word, drug trade name, original title, device manufacturer, drug manufacturer, device trade name, keyword, floating subheading word, candidate term word]

CENTRAL (Cochrane Central Register of Controlled trials) database

(<https://www.cochranelibrary.com/>)

("Mediterranean diet" AND Adherence) (ALL FIELDS)

Google Scholar database (<https://scholar.google.gr/schhp?hl=el>)

("Mediterranean diet" AND Adherence) (TIT & exclude patents and citations)

**Table S1: Search results**

| <b>Database</b>       | <b>Results<br/>11/1/2021</b> | <b>Results<br/>20/11/2021</b> | <b>Results<br/>1/11/2022</b> | <b>Total</b> |
|-----------------------|------------------------------|-------------------------------|------------------------------|--------------|
| <b>PubMed</b>         | 2203                         | 521                           | 475                          | 3199         |
| <b>Scopus</b>         | 2309                         | 476                           | 975                          | 3760         |
| <b>Web of Science</b> | 2940                         | 467                           | 1185                         | 4592         |
| <b>EMBASE</b>         | 3005                         | 464                           | 103                          | 3572         |
| <b>CENTRAL</b>        | 496                          | 65                            | 170                          | 731          |
| <b>Google Scholar</b> | 512                          | 133                           | 280                          | 925          |
| <b>Total</b>          | 11467                        | 2126                          | 3188                         | 16779        |

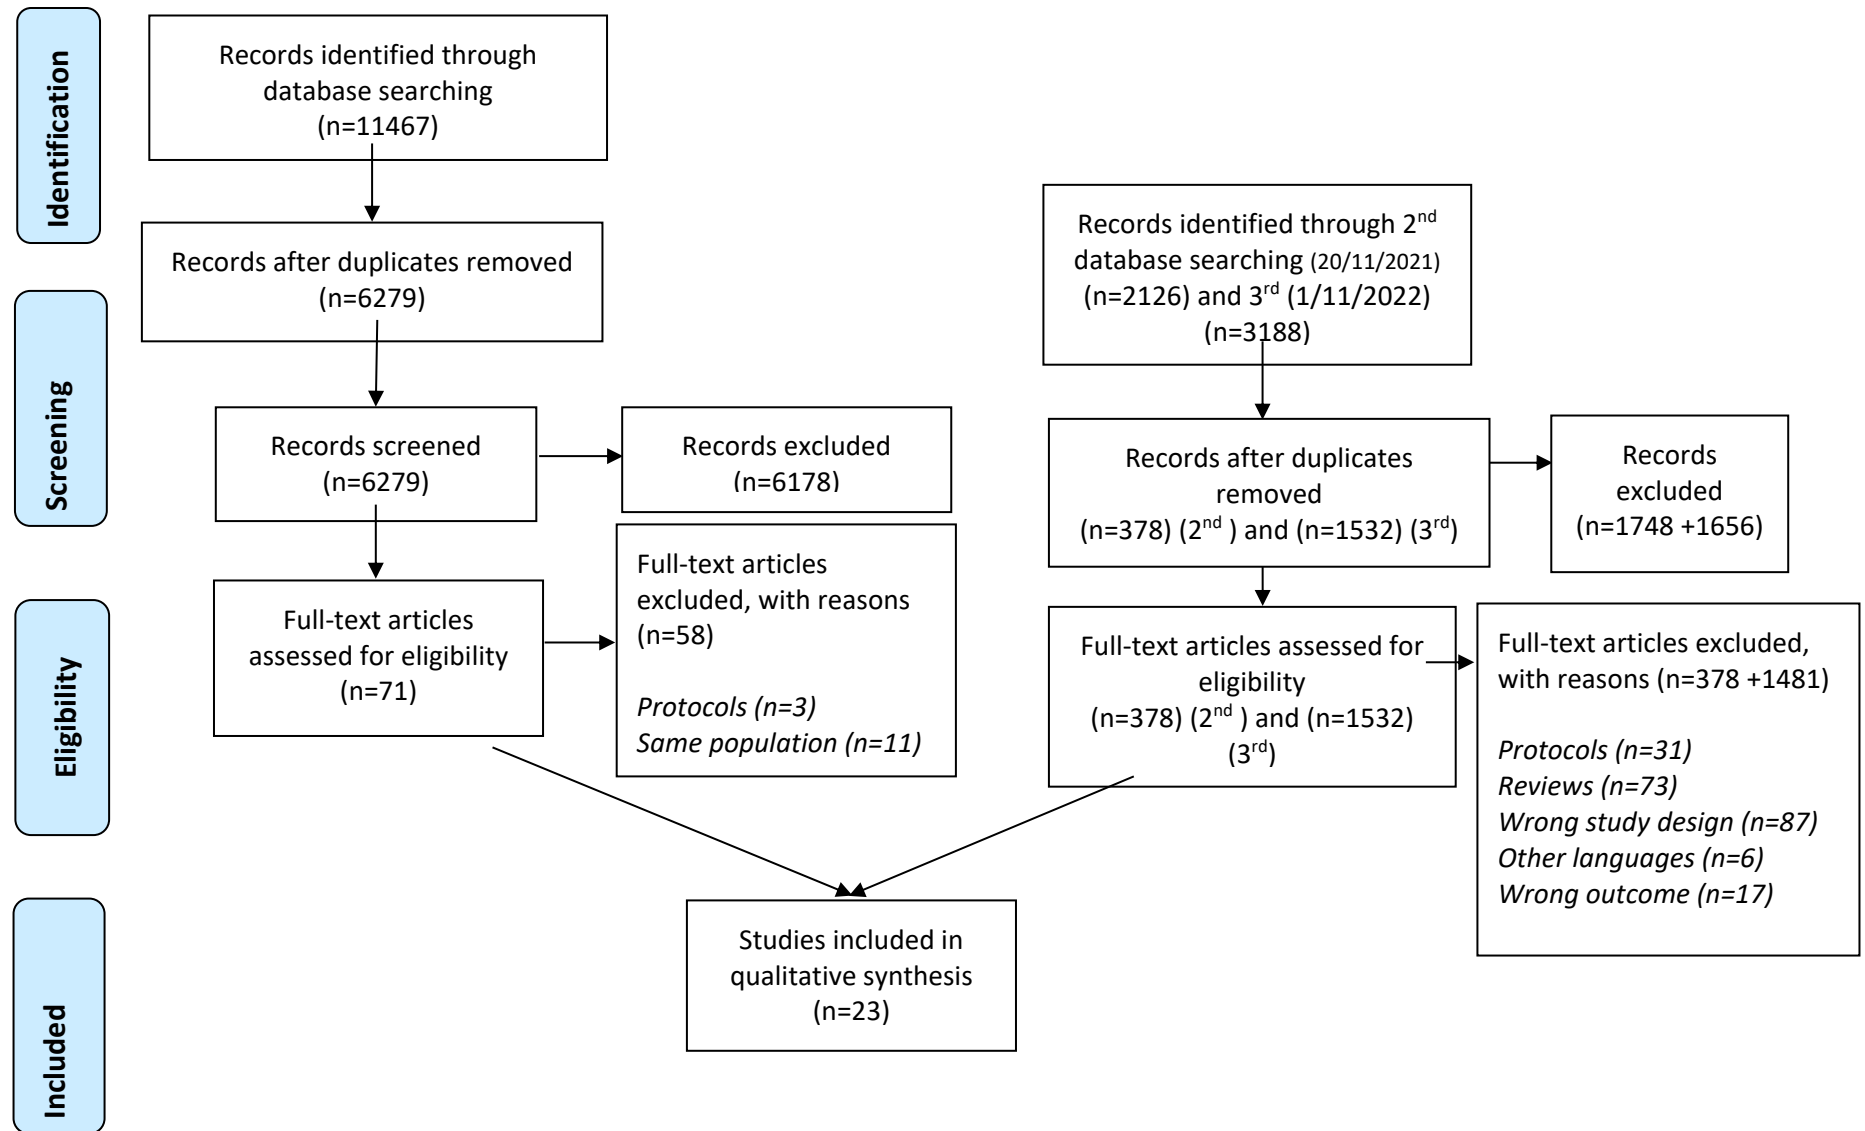

Figure S1: Flowchart of results of literature search - PRISMA Flow Chart

**Table S2: Study Characteristics**

| Study<br>(Author, year)              | Population                                               | Presence of<br>diabetes in<br>study start    | Age<br>y (range)          | N<br>Gender<br>(M%/W%)              | BMI study<br>population                       | Effect size              | Score for MD                          | Low<br>adherence to<br>MD (L) | High adherence to<br>MD (H)<br>(HR (95%CI)) | Person-<br>years       | Number of<br>cases | Incidence<br>rate per 1000<br>person years |
|--------------------------------------|----------------------------------------------------------|----------------------------------------------|---------------------------|-------------------------------------|-----------------------------------------------|--------------------------|---------------------------------------|-------------------------------|---------------------------------------------|------------------------|--------------------|--------------------------------------------|
| Abiemo et al,<br>2013 [1]            | Multi-Ethnic<br>Study of<br>Atherosclerosis<br>MESA      | *                                            | 62±10.3<br>45-84          | 5390<br>46.5/53.5                   | 27.88±5                                       | HR/<br>incidence<br>rate | 127 item FFQ<br>Alternate med<br>diet | 1                             | 1.09 (0.80-1.49)                            | L: 4936<br>H: 5013     | L: 99<br>H: 89     | L: 20.1<br>H: 17.8                         |
| Ahmad et al,<br>2020 [2]             | Women's Health<br>Study                                  | *                                            | 52.9±9.9                  | 25317<br>W                          |                                               | HR                       | Med diet score                        | 1                             | 0.70 (0.62-0.79)                            |                        |                    |                                            |
| Andre et al,<br>2020 [3]             | UK Biobank                                               | *                                            | 56.5<br>(40-71)           | 21585<br>48/52                      | Diab: 30.7 ±<br>5.5<br>Non diab:<br>26.4 ±4.3 | HR<br>/OR                | Med diet score<br>by Sofi et al       | 1                             | 0.90 (0.84-0.96) <sup>A</sup>               |                        |                    |                                            |
| Bantle et al,<br>2016[4]             | CARDIA                                                   | Excluded<br>diabetes and<br>prediabetes      | (43-55)                   | 3358<br>1445/1913                   | 24.4 kg/m <sup>2</sup> (at<br>baseline)       | OR                       | AmMedDiet                             | 1                             | 0.87 (0.72-1.04)<br>(OR)                    |                        | 393<br>(total)     |                                            |
| Brunner et al,<br>2008 [5]           | Whitehall II                                             | Healthy                                      | 50<br>(35-69)             | 7731<br>69.7/30.3(N: 5391)          | ~25                                           | HR                       | 127 item FFQ                          | 1                             | 0.94 (0.68-1.30)                            |                        | L: 167<br>H: 65    |                                            |
| Cabrera de Leon<br>et al,<br>2011[6] | CDC de<br>Canarias                                       | Excluded<br>diabetes in<br>baseline          | 18-75<br>42±16.3y         | 5521<br>42.2% M /57.8%<br>W         | NA                                            | HR                       | Med diet adh by<br>Trichopoulou       |                               | 1,1 (0,7-1,7)                               | 21106                  |                    | 7.5                                        |
| Chen et al,<br>2018[7]               | Singapore<br>Chinese Health<br>Study<br>(SCHS)<br>Health | Free from<br>Diabetes                        | 45-74                     | 45,411 total<br>L: 8,916<br>H:9,358 | 23                                            | HR                       | aMed                                  | 1                             | 0,84 (0,77-0,92)                            | L: 91711<br>H: 99269   | L: 1097<br>H: 1008 |                                            |
| DeKoning et al,<br>2011 [8]          | Professionals<br>Follow Up<br>(HPFS)                     | Without DM                                   |                           | 41615<br>M                          | ~25                                           | HR                       | aMed                                  | 1                             | 0.75 (0.66-0.86)                            | L: 151824<br>H: 141248 | L:705<br>H: 405    |                                            |
| Esfandiar et al,<br>2022[9]          | Tehran Glucose<br>and Lipids<br>(TGLS)                   | Excluded<br>diabetes from<br>analysis        | 41.2±14.1                 | 3265/4003                           | 27.1±4.5                                      | HR                       | Med diet adh by<br>Trichopoulou       | 1                             | 1.06 (0.87-1.30)                            |                        |                    |                                            |
| Galbete et al,<br>2018[10]           | EPIC Potsdam                                             | Excluded<br>diabetes                         | 49.8±8.9                  | 38.9% M                             | 26.1±4.2                                      | HR                       | Med diet adh by<br>Trichopoulou       | 1                             | 0.84 (0,73-0,97)                            | L: 73939<br>H:70578    | L:445<br>H:353     |                                            |
| Glenn et al,<br>2023[11]             | WHI (Women's<br>Health Initiative)<br>Australia          | Free from<br>diabetes                        | 63±7                      | 56717 W                             | L:28.7±6.1<br>H:26.7±5.4                      | HR                       | aMed                                  | 1                             | 0.88 (0.83-0.94)                            | L: 406039<br>H: 498638 | L:2957<br>H:2411   |                                            |
| Hlaing Hlaing et<br>al, 2021[12]     | Longitudinal<br>Study on<br>Women's Health<br>(ALSWH)    | Free from<br>Non<br>communicable<br>diseases | L: 52.4±1.5<br>H:52.6±1.4 | L:1769<br>H:642<br>W                |                                               | OR                       | MDS                                   | 1                             | 0.76 (0.48-1.21)                            |                        |                    |                                            |
| Hodge et al,<br>2021 [13]            | Melbourne<br>Collaborative                               | Excluded<br>diabetes                         | 55.2±8.7                  | 40.3% M<br>59.7% W                  | 26.8±4                                        | IRR                      | Med Diet Adh<br>by Trichopoulou       | 1                             | IRR<br>0.98 (0.85-1.13)                     |                        |                    |                                            |

| Cohort                                           |                                                                          |                                                 |                                                            |                                          |                                                                              |                         |                                                              |   |                                          |                                                       |                                                              |
|--------------------------------------------------|--------------------------------------------------------------------------|-------------------------------------------------|------------------------------------------------------------|------------------------------------------|------------------------------------------------------------------------------|-------------------------|--------------------------------------------------------------|---|------------------------------------------|-------------------------------------------------------|--------------------------------------------------------------|
| InterAct Consortium (Romaguera et al, 2011) [14] | InterAct EPIC                                                            | *                                               | 52.9 ± 8.9 (25-75)                                         | 15798<br>37.8/62.2                       | 26.6 ± 3.6<br>25.7 ± 4.5                                                     | HR                      | rMed                                                         | 1 | 0.88 (0.79-0.98)                         | L: 3879<br>/3.902<br>H:4380 /<br>7.392                |                                                              |
| Jacobs et al, 2014[15]                           | Hawaii -MEC                                                              | Excluded diabetes                               | Men L:56(16)<br>H:61(17)<br>Women:<br>L:54(16)<br>H:61(16) | M: 12557<br>W: 21683                     | Men: L:25.3 (4.7)<br>H: 24.6 (4.3)<br>Women<br>L:23.7 (5.7)<br>H: 23.2 (5.3) | HR                      | aMed                                                         | 1 | 0,89 (0,80-0,99) M<br>0,92 (0,84-1,02) F | Men<br>L:7403<br>H:5154<br>Women<br>L:8902<br>H:12781 | Men<br>L: 1090<br>H: 659<br>Women<br>L:1018<br>H:1433        |
| Koloverou et al, 2015 [17]                       | ATTICA                                                                   | *                                               | (18-89)                                                    | 3043<br>49.8/50.2                        | L:29±4.2<br>H:22±2.5                                                         | Cases /OR/10y incidence | Med diet by Panagiotakos et al                               | 1 | 0.38 (0.16-0.88) (RR)                    |                                                       | L:83<br>H:8                                                  |
| Martinez-Gonzalez et al, 2008 [18]               | SUN Navarra                                                              | Without DM                                      | 37.8 (20-90)                                               | 13380<br>39.7/60.3                       | 23.4±3.4                                                                     | Incidence/R R           | 136 FFQ -Med diet by Trichopoulou                            |   | 0.17 (0.04-0.75) (incidence rate ratio)  |                                                       |                                                              |
| Mozaffarian et al, 2007 [19]                     | GISSI Prevezione                                                         | *                                               | 59 ± 11 (20-90)                                            | 8291<br>87.03/12.97                      | 26.3 +3.4                                                                    | HR                      | FFQ                                                          | 1 | 0.65 (0.49-0.85)                         | L: 1423<br>H: 6289                                    | L: 83<br>H:179<br>L: 58 H:28                                 |
| oConnor et al, 2020 [20]                         | Atherosclerosis risk in Communities Study ARIC                           | *                                               | 54±5 (45-65)                                               | 11991<br>43.7/56.3                       | 27.3 ± 5.2                                                                   | HR                      | aMed                                                         | 1 | 0.94 (0.82-1.07)                         |                                                       | L: 796<br>H:376<br>L: 1.8<br>H:1.6<br>(per 100 person-years) |
| Ortega et al, 2013[21]                           | The Di@bet.es Study                                                      | Differentiated free from diabetes with diabetes | 45                                                         | 5076<br>2177 (43% )M<br>2899(57%) W      | L: 28.1±5.6<br>H: 28.1±4.8                                                   | OR                      | Med diet by Panagiotakos et al                               | 1 | 0.73 (0.69-0.98)                         |                                                       |                                                              |
| Ramezan et al, 2019[22]                          | Tehran Glucose and Lipid Study <sup>b</sup>                              | Free of diabetes in previous reports            | L: 48.1±12.9<br>H:52.8±12.7                                | L: 45.6% men<br>H:41.2% men              | L:29±5.7<br>H:29.1±5.2                                                       | OR                      | Med diet adh by Trichopoulou                                 | 1 | 0.93 (0.44-1.96)                         |                                                       |                                                              |
| Rossi et al, 2013 [23]                           | EPIC                                                                     | *                                               | ~50 (20-80) baseline (39-63) <sup>§</sup>                  | 22295                                    | ~27-28                                                                       | HR                      | MDS by FFQ                                                   | 1 | 0.88 (0.78-0.99)                         | L: 73.997<br>H:59.542                                 | L:716<br>H: 582                                              |
| Tison et al, 2022[24]                            | REasons for Geographic And Racial Differences in Stroke (REGARDS) study. | Without diabetes                                | 63.2±8.5                                                   | Men: 3834 (43.8%)<br>Women: 4916 (56.2%) | NA                                                                           | RR                      | Adjusted for dementia(Block9 8 FFQ) Med diet by Trichopoulou | 1 | 1.15 (0.93-1.41)                         |                                                       | L: 13.6<br>H:10.3                                            |
| Tobias et al, 2012 [25]                          | Nurses Health Study II                                                   | History of GDM                                  | 37.8 ± 4.8<br>24-44                                        | 4413 W                                   | 25-28                                                                        | HR                      | aMed                                                         | 1 | 0.60 (0.44-0.82)                         | L: 12.198<br>H:13.423                                 | L: 137<br>H: 106                                             |

*A: regression coefficient not applicable for synthesis, b: was included also because it was included in the synthesis of odds ratio*

**Table S3. Adjustments in models of each study**

| Study<br>(Author, year)                                | Adjustments                                                                                                                                                                                                                                                                                                                                                                                                                                                                                                                                                                                                                                                                                                                                                                                                                                                                                                                                                                                                                                                                                                                                                                                                                                                                           |
|--------------------------------------------------------|---------------------------------------------------------------------------------------------------------------------------------------------------------------------------------------------------------------------------------------------------------------------------------------------------------------------------------------------------------------------------------------------------------------------------------------------------------------------------------------------------------------------------------------------------------------------------------------------------------------------------------------------------------------------------------------------------------------------------------------------------------------------------------------------------------------------------------------------------------------------------------------------------------------------------------------------------------------------------------------------------------------------------------------------------------------------------------------------------------------------------------------------------------------------------------------------------------------------------------------------------------------------------------------|
| Abiemo et al, 2013[1]                                  | Age, gender, nationality, health center, education status, family income, smoking, PA, energy intake, waist circumference                                                                                                                                                                                                                                                                                                                                                                                                                                                                                                                                                                                                                                                                                                                                                                                                                                                                                                                                                                                                                                                                                                                                                             |
| Ahmad et al, 2020[2]                                   | Age, treatment, energy intake, insulin resistance, BMI, HDL, LDL, hypertension, HbA1c, biochemical markers and inflammation markers                                                                                                                                                                                                                                                                                                                                                                                                                                                                                                                                                                                                                                                                                                                                                                                                                                                                                                                                                                                                                                                                                                                                                   |
| Andre et al, 2020[3]                                   | Age, gender, education status, energy intake, sedentary life, smoking, overweight                                                                                                                                                                                                                                                                                                                                                                                                                                                                                                                                                                                                                                                                                                                                                                                                                                                                                                                                                                                                                                                                                                                                                                                                     |
| Bantle et al, 2016[4]                                  | Age, sex, race, field center, BMI, education, smoking, caloric intake, and tertiles of physical activity                                                                                                                                                                                                                                                                                                                                                                                                                                                                                                                                                                                                                                                                                                                                                                                                                                                                                                                                                                                                                                                                                                                                                                              |
| Brunner et al, 2008[26]                                | Age, gender, nationality, smoking, PA, social economic status, dietary misreporting                                                                                                                                                                                                                                                                                                                                                                                                                                                                                                                                                                                                                                                                                                                                                                                                                                                                                                                                                                                                                                                                                                                                                                                                   |
| Cabrera De Leon et al, 2011[6]                         | Age, sex, impaired fasting glucose, Canary Islands ancestry, metabolic syndrome, low HDL cholesterol, arterial hypertension, waist-to-height ratio >0.55, waist circumference > 94 or > 80 cm, insulin resistance, BMI ≥ 30 kg/m <sup>2</sup> , family history of Type 2 diabetes mellitus, alcohol intake, sedentarism, adherence to Mediterranean diet, social class, and interaction terms between these variables.                                                                                                                                                                                                                                                                                                                                                                                                                                                                                                                                                                                                                                                                                                                                                                                                                                                                |
| Chen et al, 2018 [7]                                   | Model 1 adjusted for age at baseline interview (years), sex, dialect group (Hokkien or Cantonese), year of baseline interview (1993–1995 or 1996–1998), and energy intake (kcal/day). Model 2 included the potential confounders in model 1 and additionally adjusted for body mass index, physical activity (no moderate or vigorous activity; 0.5–3.9 hours/week of moderate activity or 0.5–1.9 hours/ week of vigorous activity; or ≥4.0 hours/week of moderate activity or ≥2.0 hours/week of vigorous activity), education (no for- mal education, primary school, or secondary school or higher), smoking (never smoker, former smoker, current smoker of 1–12 cigarettes/day, or current smoker of ≥13 cigarettes/day), and self-reported history of physician-diagnosed hypertension. Analyses for the aMED, AHEI-2010, and DASH indices additionally adjusted for coffee consumption (cups/day), and analyses for the DASH, PDI, and hPDI indices additionally adjusted for alcohol consumption (none, light (<0.5 servings/ day), moderate (0.5–1.9 servings/day for men and 0.5–1.4 servings/day for women), moderate to heavy (2.0–3.4 servings/ day for men and 1.5–2.4 servings/day for women), or heavy (≥3.5 servings/day for men and ≥2.5 servings/day for women)). |
| De Koning et al, 2011[27]                              | Age, smoking, PA, BMI, family history, coffee consumption, energy intake                                                                                                                                                                                                                                                                                                                                                                                                                                                                                                                                                                                                                                                                                                                                                                                                                                                                                                                                                                                                                                                                                                                                                                                                              |
| Esfandiar et al, 2022[9]                               | Age, sex, diabetes risk score, physical activity, smoking, dietary fiber, and total energy intake                                                                                                                                                                                                                                                                                                                                                                                                                                                                                                                                                                                                                                                                                                                                                                                                                                                                                                                                                                                                                                                                                                                                                                                     |
| Galbete et al, 2018[10]                                | Age, sex, smoking status, education, total energy (kcal/day), vitamin supplementation, body mass index (kg/m <sup>2</sup> ), waist circumference (cm), cycling, sports, prevalent hypertension (not in the analyses on cancer)                                                                                                                                                                                                                                                                                                                                                                                                                                                                                                                                                                                                                                                                                                                                                                                                                                                                                                                                                                                                                                                        |
| Glenn et al, 2023[11]                                  | Model 1 adjustments include age (continuous), region (Northeast, South, Mid- west, West), smoking (never, past, current) and study arm (HRT, DM, CaD). Model 2 adjustments include model 1 adjustments plus self-identified race and ethnicity (White, African American, Hispanic, Asian), education (college or above, below college), marital status (presently married, other), hysterectomy history (yes, no), physical activity (continuous), alcohol intake (\$7 drinks/week, <7 drinks/week [excluded from aMED analysis, as alcohol intake is included in the score]), energy intake (continuous), hypertension status (yes, no), family history of diabetes (yes, no), HT use (never, past, current), cholesterol-lowering medication use (yes, no). Model 3 adjustments include model 2 adjustments plus BMI (continuous).                                                                                                                                                                                                                                                                                                                                                                                                                                                  |
| Hlaing- Hlaing et al, 2021[12]                         | Adjusted covariates were age; socioeconomic status (marital status, residence, education, occupation, and ability to manage income); lifestyle variables (smoking status, physical activity, taking prescribed and over-the-counter medicine) for all NCD outcomes. History of depression and/or anxiety at any previous survey(s) was included as a covariate                                                                                                                                                                                                                                                                                                                                                                                                                                                                                                                                                                                                                                                                                                                                                                                                                                                                                                                        |
| Hodge et al, 2021[13]                                  | Age, sex, SEIFA, smoking status, drinking status, family history of diabetes and physical activity level at baseline, BMI, WHR, country of birth                                                                                                                                                                                                                                                                                                                                                                                                                                                                                                                                                                                                                                                                                                                                                                                                                                                                                                                                                                                                                                                                                                                                      |
| InterAct Consortium et al (Romaguera et al), 2011 [14] | Gender, smoking, PA, energy intake, education status & model was stratified based on research center and was adjusted for gender, BMI, education level, physical activity, smoking and energy intake.                                                                                                                                                                                                                                                                                                                                                                                                                                                                                                                                                                                                                                                                                                                                                                                                                                                                                                                                                                                                                                                                                 |
| Jacobs et al, 2014[15]                                 | age, adjusted for physical activity (h/week), smoking (current smoker, past smoker, never smoker), years of education (<12, 12, 13–15 and ≥16 years), total energy intake (kJ/day) and BMI (<22, 22 to <25, 25 to <30 and ≥30 kg/m <sup>2</sup> ). Models including men of all ethnicities combined were additionally adjusted for ethnicity (white, Japanese-American, Native Hawaiian and other ethnicity)                                                                                                                                                                                                                                                                                                                                                                                                                                                                                                                                                                                                                                                                                                                                                                                                                                                                          |

|                                   |                                                                                                                                                                                                                                                                                                                                                                                                                                                                                                                                                              |
|-----------------------------------|--------------------------------------------------------------------------------------------------------------------------------------------------------------------------------------------------------------------------------------------------------------------------------------------------------------------------------------------------------------------------------------------------------------------------------------------------------------------------------------------------------------------------------------------------------------|
| Koloverou et al, 2015[28]         | Age, gender, family DM history, smoking, hypertension, hypercholesterolemia, education, PA, waist circumference                                                                                                                                                                                                                                                                                                                                                                                                                                              |
| Martinez Gonzalez et al, 2008[29] | Age, gender, education years, BMI, family DM history , hypertension, PA, hours of sedentary life, smoking, energy intake                                                                                                                                                                                                                                                                                                                                                                                                                                     |
| Mozzafarian et al, 2007[19]       | model was adjusted for age, gender, smoking, time since MI to entry of study, treatment category, BMI, maximal capacity to exercise during stress testing (quintiles), presence of ischemia during stress testing, New York Heart Association heart failure symptoms, Canadian Cardiovascular Society angina symptoms, history of hypertension, prior MI before the incident that was for inclusion to the study, use of angiotensin converting enzyme inhibitors , use of b-blockers, use of diuretics, use of statins, cheese, wine and coffee consumption |
| O'Connor et al, 2020[20]          | Age, gender, health center, energy intake, PA, smoking, clinical markers, social status, behavior, nationality, BMI                                                                                                                                                                                                                                                                                                                                                                                                                                          |
| Ortega et al, 2013[21]            | Multiple adjusted models included age, BMI and WC (as continuous variables), sex, educational level (university vs. lower than university education), civil status (married vs. others), hypertension, dyslipidemia, physical exercise (exercising at least once a week), smoking status (current vs. never/former) and a family history of diabetes in 1st-degree relatives.                                                                                                                                                                                |
| Ramezan et al, 2019[22]           | Model 1: conditional analysis matched on age, sex, and date of data collection and controlled for family history of diabetes, body mass index, educational level, smoking status, physical activity, and total energy intake.<br>Model 2: multiple adjusted model, additionally adjusted for waist circumference, hypercholesterolaemia, and hypertension.                                                                                                                                                                                                   |
| Rossi et al, 2013[23]             | Age, gender, education status, BMI, PA, WHR, energy intake                                                                                                                                                                                                                                                                                                                                                                                                                                                                                                   |
| Tison et al, 2022[24]             | Crude model: unadjusted estimates. Model 1: adjustment for TEI and demographics of age, race, sex, region, income, and education. Model 2: further adjustment for lifestyle factors of smoking, physical activity, and alcohol.                                                                                                                                                                                                                                                                                                                              |
| Tobias et al, 2012[25]            | Age, energy intake, BMI, nationality, smoking, PA, family history. 3 models: 1 <sup>st</sup> was adjusted for age and energy intake, 2 <sup>nd</sup> for number of births, age for the birth of first child, nationality, family history of DMT-2, use of contraceptives, phase of reproductive age (menopause stages), smoking, physical activity, and in the 3 <sup>rd</sup> BMI was added to adjustments                                                                                                                                                  |



Figure S2. Forest plot of Hazard ratio

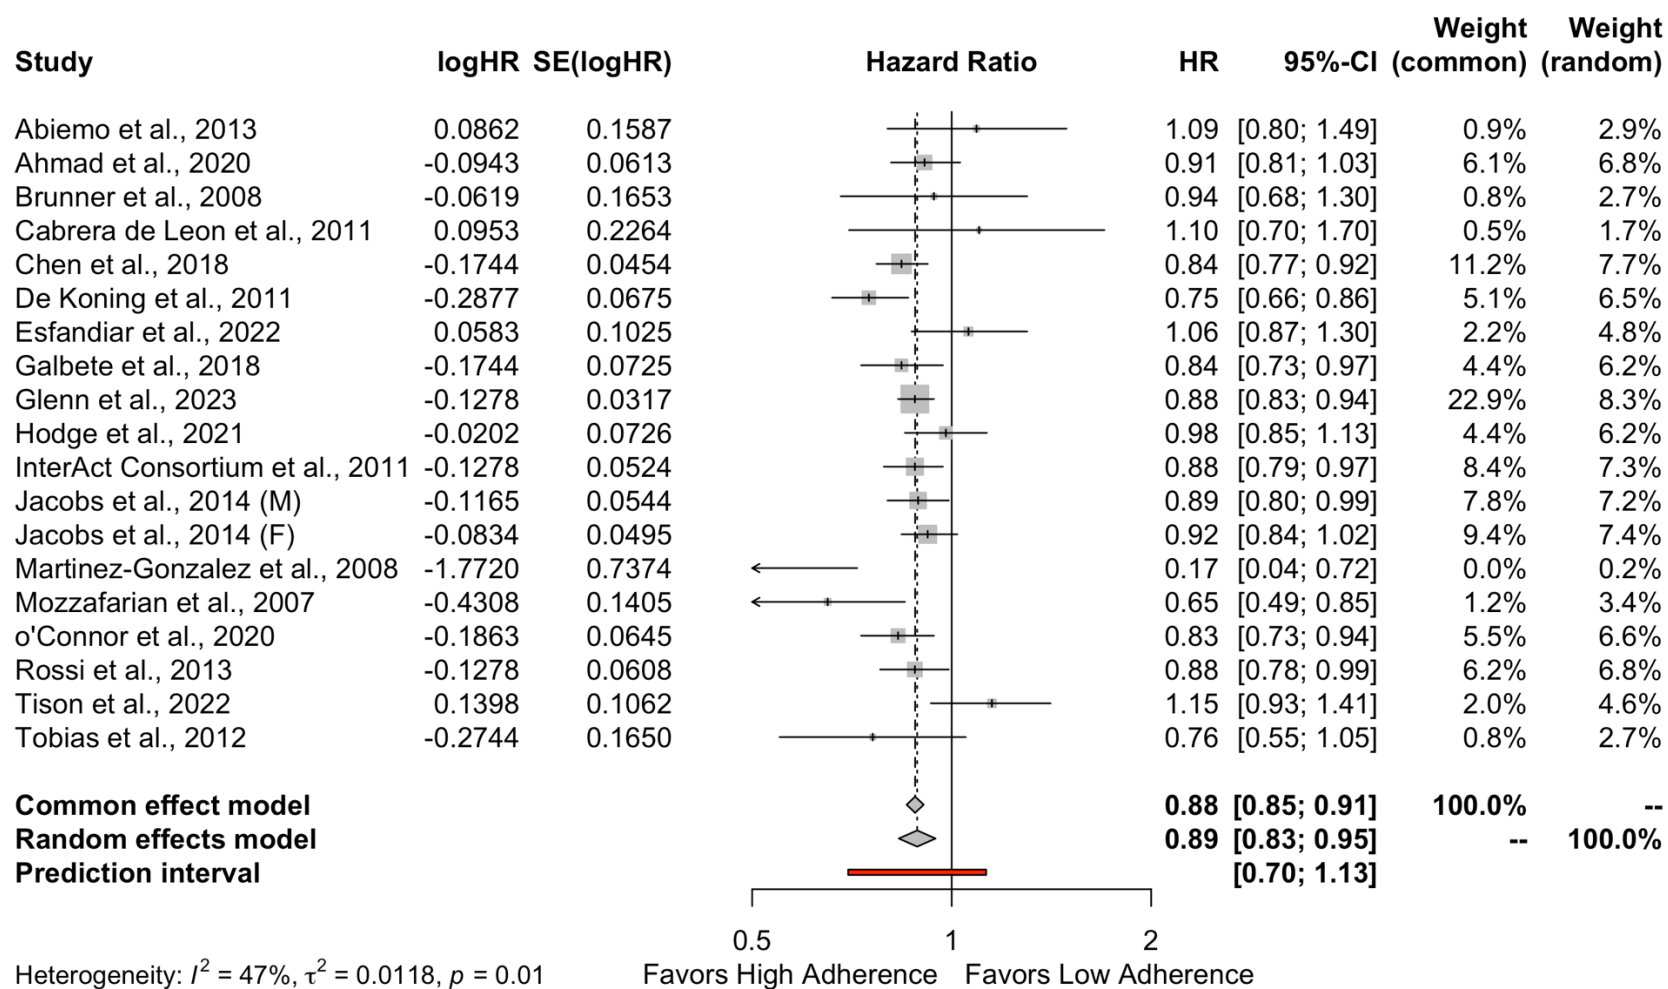

Figure S3. Forest plot of Odds Ratio

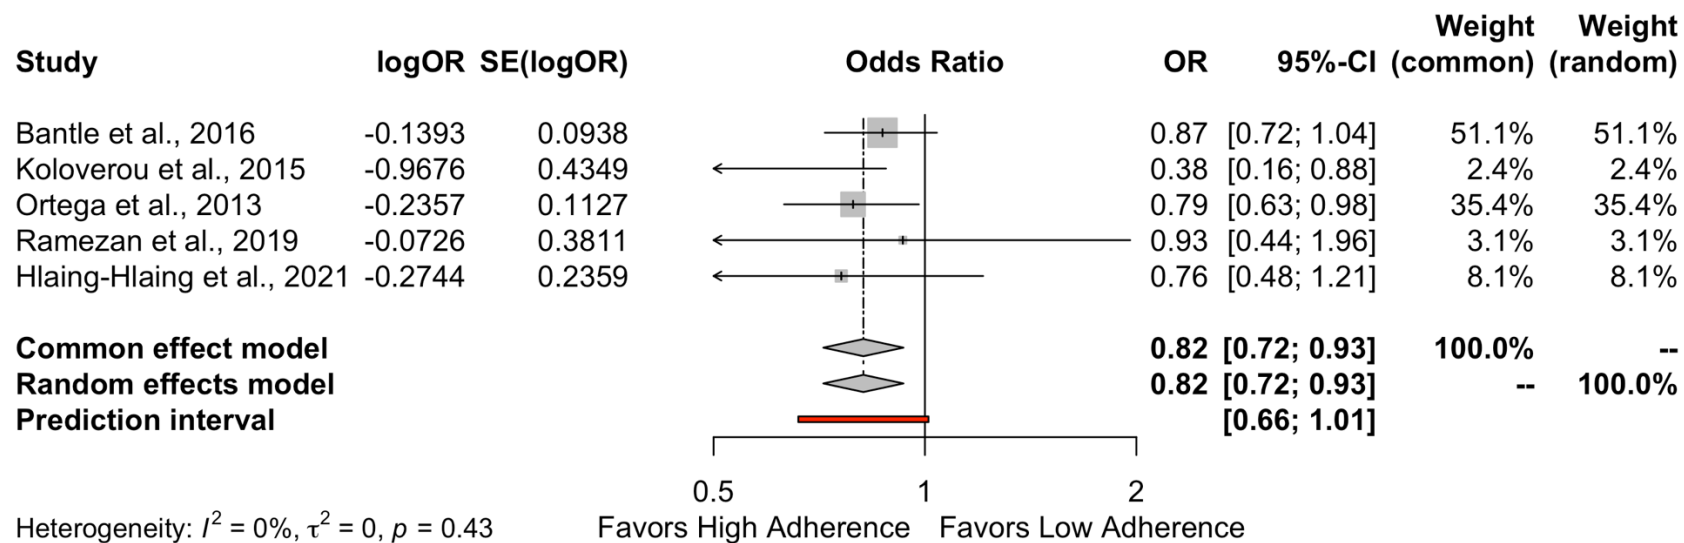

**Table S4. Study Quality Assessment with Newcastle-Ottawa scale**

| Study<br>(Author, year)              | Representativeness<br>of the sample | Selection<br>of the<br>non-<br>exposed<br>cohort | Ascertainment<br>of exposure | Demonstration<br>that outcome of<br>interest was not<br>present at start<br>of study | Comparability<br>of cohorts on<br>the basis of the<br>design or<br>analysis<br>controlled for<br>confounders | Assessment<br>of outcome | Was<br>follow-up<br>long<br>enough for<br>outcomes<br>to occur? | Indicate the<br>median<br>duration of<br>follow up and<br>a brief<br>rationale for<br>the assessment<br>above | Adequacy of<br>follow up of<br>cohorts | Selection<br>domain | Comparability<br>domain | Outcome<br>exposure<br>domain | NOS  |
|--------------------------------------|-------------------------------------|--------------------------------------------------|------------------------------|--------------------------------------------------------------------------------------|--------------------------------------------------------------------------------------------------------------|--------------------------|-----------------------------------------------------------------|---------------------------------------------------------------------------------------------------------------|----------------------------------------|---------------------|-------------------------|-------------------------------|------|
| Abiemo et al,<br>2013[1]             | *                                   | *                                                | *                            | *                                                                                    | **                                                                                                           | *                        |                                                                 | 6                                                                                                             | *                                      | 4                   | 2                       | 2                             | Good |
| Ahmad et al,<br>2020[2]              | *                                   | *                                                | *                            |                                                                                      | **                                                                                                           |                          | *                                                               | 19.8                                                                                                          | *                                      | 3                   | 2                       | 2                             | Good |
| Andre et al<br>2020[3]               | *                                   | *                                                | *                            | *                                                                                    | *                                                                                                            |                          |                                                                 | 6                                                                                                             | *                                      | 4                   | 1                       | 1                             | Poor |
| Bantle et al,<br>2016[4]             | *                                   | *                                                | *                            | *                                                                                    | **                                                                                                           | *                        | *                                                               | 25                                                                                                            | *                                      | 4                   | 1                       | 2                             | Good |
| Brunner et al,<br>2008[26]           | *                                   | *                                                | *                            | *                                                                                    | **                                                                                                           | *                        | *                                                               | 15                                                                                                            | *                                      | 4                   | 2                       | 3                             | Good |
| Cabrera De<br>Leon et al,<br>2011[6] | *                                   | *                                                | *                            | *                                                                                    | **                                                                                                           | *                        |                                                                 | 3,5                                                                                                           | *                                      | 4                   | 2                       | 2                             | Good |
| Chen et al,<br>2018[7]               | *                                   | *                                                | *                            | *                                                                                    | **                                                                                                           | *                        | *                                                               | 11,5                                                                                                          |                                        | 4                   | 2                       | 2                             | Good |
| DeKoning et al,<br>2011[27]          | *                                   | *                                                |                              | *                                                                                    | **                                                                                                           |                          | *                                                               | 20                                                                                                            | *                                      | 3                   | 2                       | 2                             | Good |
| Esfandiar et al,<br>2022[9]          | *                                   | *                                                | *                            | *                                                                                    | **                                                                                                           | *                        |                                                                 | 6,6                                                                                                           | *                                      | 4                   | 2                       | 2                             | Good |
| Galbete et al,<br>2018[10]           | *                                   | *                                                | *                            | *                                                                                    | **                                                                                                           | *                        | *                                                               | 10,6                                                                                                          | *                                      | 4                   | 2                       | 2                             | Good |
| Glenn et al,<br>2023[11]             | *                                   | *                                                | *                            | *                                                                                    | **                                                                                                           | *                        | *                                                               | 16                                                                                                            | *                                      | 4                   | 2                       | 3                             | Good |
| Hlaing-Hlaing<br>et al, 2021[12]     | *                                   | *                                                | *                            | *                                                                                    | *                                                                                                            | *                        | *                                                               | 15                                                                                                            | *                                      | 4                   | 2                       | 2                             | Good |
| Hodge et al,<br>2021[13]             | *                                   | *                                                | *                            | *                                                                                    | **                                                                                                           |                          | *                                                               | 13                                                                                                            | *                                      | 4                   | 2                       | 2                             | Good |
| InterAct<br>Consortium               |                                     |                                                  |                              |                                                                                      |                                                                                                              |                          |                                                                 |                                                                                                               |                                        |                     |                         |                               |      |
| Romaguera et<br>al,<br>2011[14]      | *                                   | *                                                | *                            | *                                                                                    | **                                                                                                           | *                        |                                                                 | 7                                                                                                             | *                                      | 4                   | 2                       | 2                             | Good |
| Jacobs et al,<br>2014[15]            | *                                   | *                                                | *                            | *                                                                                    | **                                                                                                           | *                        | *                                                               |                                                                                                               | *                                      | 4                   | 2                       | 2                             | Good |
| Koloverou et al,<br>2015[28]         | *                                   | *                                                | *                            | *                                                                                    | *                                                                                                            | *                        | *                                                               | 10                                                                                                            | *                                      | 4                   | 1                       | 3                             | Good |
| Martinez-<br>Gonzalez et al,         | *                                   | *                                                | *                            | *                                                                                    | **                                                                                                           | *                        |                                                                 | 4.4                                                                                                           |                                        | 4                   | 2                       | 1                             | Poor |

|                             |   |   |   |   |    |   |   |     |   |   |   |   |      |
|-----------------------------|---|---|---|---|----|---|---|-----|---|---|---|---|------|
| 2008[29]                    |   |   |   |   |    |   |   |     |   |   |   |   |      |
| Mozaffarian et al, 2007[19] | * | * |   | * | ** | * |   | 3   | * | 3 | 2 | 2 | Good |
| O'Connor et al, 2020[20]    | * | * | * | * | ** |   | * | 22  | * | 4 | 2 | 2 | Good |
| Ortega et al, 2013[21]      | * | * | * | * | *  | * |   |     |   | 4 | 2 | 0 | Fair |
| Ramezan et al, 2019[22]     | * | * | * | * | ** | * |   | 6-9 |   | 4 | 2 | 1 | Good |
| Rossi et al, 2013[23]       | * | * | * | * | ** | * | * | 11  | * | 4 | 2 | 3 | Good |
| Tison et al, 2022[24]       | * | * | * | * | ** | * | * | 10  | * | 4 | 2 | 2 | Good |
| Tobias et al, 2012[25]      | * | * |   | * | ** |   | * | 16  | * | 3 | 2 | 2 | Good |

**Table S5: Study Quality Assessment with Joanna Briggs Institute (JBI) Scale**

| Study<br>(Author, year)                     | Were the two<br>groups<br>similar and<br>recruited<br>from the same<br>population? | Were the exposures<br>measured similarly<br>to assign people to<br>both exposed and<br>unexposed groups? | Were<br>confounding<br>factors<br>identified? | Were strategies<br>to deal with<br>confounding<br>factors stated? | Were the<br>groups/<br>participants free<br>of the outcome<br>at the start of the<br>study (or at the<br>moment of<br>exposure)? | Were the<br>outcomes<br>measured in<br>a valid and<br>reliable<br>way? | Was the<br>follow up time<br>reported and<br>sufficient to be<br>long enough<br>for outcome to<br>occur? | Was follow<br>up complete<br>and if not,<br>were the<br>reasons to<br>loss to follow<br>up described<br>and explored? | Were<br>strategies to<br>address<br>incomplete<br>follow up<br>utilized? | Was<br>appropriate<br>statistical<br>analysis<br>used? | Overall<br>appraisal | Comments                                                               |
|---------------------------------------------|------------------------------------------------------------------------------------|----------------------------------------------------------------------------------------------------------|-----------------------------------------------|-------------------------------------------------------------------|----------------------------------------------------------------------------------------------------------------------------------|------------------------------------------------------------------------|----------------------------------------------------------------------------------------------------------|-----------------------------------------------------------------------------------------------------------------------|--------------------------------------------------------------------------|--------------------------------------------------------|----------------------|------------------------------------------------------------------------|
| Abiemo et al, 2013                          | Yes                                                                                | Yes                                                                                                      | Yes                                           | Yes                                                               | Yes                                                                                                                              | Yes                                                                    | No                                                                                                       | Yes                                                                                                                   | No                                                                       | Yes                                                    | Include              |                                                                        |
| Ahmad et al, 2020                           | Yes                                                                                | Yes                                                                                                      | Yes                                           | Yes                                                               | Yes                                                                                                                              | No                                                                     | Yes                                                                                                      | Yes                                                                                                                   | No                                                                       | Yes                                                    | Include              |                                                                        |
| Andre et al, 2020                           | Yes                                                                                | Yes                                                                                                      | Yes                                           | Yes                                                               | Yes                                                                                                                              | No                                                                     | No                                                                                                       | Yes                                                                                                                   | Yes                                                                      | No                                                     | Exclude              |                                                                        |
| Bantle et al, 2016                          | Yes                                                                                | Yes                                                                                                      | Yes                                           | Yes                                                               | Yes                                                                                                                              | Yes                                                                    | Yes                                                                                                      | Yes                                                                                                                   | No                                                                       | Yes                                                    | Include              |                                                                        |
| Brunner et al, 2008                         | Yes                                                                                | Yes                                                                                                      | Yes                                           | Yes                                                               | Yes                                                                                                                              | Yes                                                                    | Yes                                                                                                      | Yes                                                                                                                   | Yes                                                                      | Yes                                                    | Include              |                                                                        |
| Cabrera De Leon et al, 2011                 | Yes                                                                                | Yes                                                                                                      | Yes                                           | Yes                                                               | Yes                                                                                                                              | Yes                                                                    | No                                                                                                       | No                                                                                                                    | Yes                                                                      | No                                                     | Include              | Reasons of lost to follow up were not provided but good % of follow up |
| Chen et al, 2018                            | Yes                                                                                | Yes                                                                                                      | Yes                                           | Yes                                                               | Yes                                                                                                                              | Yes                                                                    | Yes                                                                                                      | Yes                                                                                                                   | Yes                                                                      | Yes                                                    | Include              |                                                                        |
| DeKoning et al, 2011                        | Yes                                                                                | Yes                                                                                                      | Yes                                           | Yes                                                               | Yes                                                                                                                              | No                                                                     | Yes                                                                                                      | Yes                                                                                                                   | Yes                                                                      | Yes                                                    | Include              |                                                                        |
| Esfandiar et al, 2022                       | Yes                                                                                | Yes                                                                                                      | Yes                                           | Yes                                                               | Yes                                                                                                                              | Yes                                                                    | No                                                                                                       | Yes                                                                                                                   | Yes                                                                      | Yes                                                    | Include              | Good design                                                            |
| Galbete et al, 2018                         | Yes                                                                                | Yes                                                                                                      | Yes                                           | Yes                                                               | Yes                                                                                                                              | Yes                                                                    | Yes                                                                                                      | Yes                                                                                                                   | Yes                                                                      | Yes                                                    | Include              |                                                                        |
| Glenn et al, 2023                           | Yes                                                                                | Yes                                                                                                      | Yes                                           | Yes                                                               | Yes                                                                                                                              | Yes                                                                    | Yes                                                                                                      | Yes                                                                                                                   | NA                                                                       | Yes                                                    | Include              |                                                                        |
| Hlaing- Hlaing et al, 2021                  | Yes                                                                                | Yes                                                                                                      | Yes                                           | Yes                                                               | Yes                                                                                                                              | Yes                                                                    | Yes                                                                                                      | Yes                                                                                                                   | Yes                                                                      | Yes                                                    | Include              |                                                                        |
| Hodge et al, 2021                           | Yes                                                                                | Yes                                                                                                      | Yes                                           | Yes                                                               | Yes                                                                                                                              | No                                                                     | Yes                                                                                                      | No                                                                                                                    | No                                                                       | Yes                                                    | Include              |                                                                        |
| InterAct Consortium (Romaguera et al,) 2011 | Yes                                                                                | Yes                                                                                                      | Yes                                           | Yes                                                               | Yes                                                                                                                              | Yes                                                                    | No                                                                                                       | Yes                                                                                                                   | Yes                                                                      | Yes                                                    | Include              |                                                                        |
| Jacobs et al, 2014                          | Yes                                                                                | Yes                                                                                                      | Yes                                           | Yes                                                               | Yes                                                                                                                              | Yes                                                                    | No                                                                                                       | Yes                                                                                                                   | Yes                                                                      | Yes                                                    | Include              |                                                                        |
| Koloverou et al, 2015                       | Yes                                                                                | Yes                                                                                                      | Yes                                           | Yes                                                               | Yes                                                                                                                              | Yes                                                                    | Yes                                                                                                      | Yes                                                                                                                   | Yes                                                                      | Yes                                                    | Include              | Not same measure in outcome                                            |
| Martinez                                    | Yes                                                                                | Yes                                                                                                      | Yes                                           | Yes                                                               | Yes                                                                                                                              | Yes                                                                    | No                                                                                                       | Yes                                                                                                                   | Yes                                                                      | Yes                                                    | Include              | Young                                                                  |



**Table S6: Subgroup analyses of the Mediterranean Diet and the risk of type 2 diabetes (highest versus lowest category metanalysis)**

|                                      | Number of<br>Studies (N) | HR (95%CI)         | Prediction<br>Interval | $\tau^2$ (95%CI)     | $I^2$ (%), (95%CI),<br>$P_{\text{heterogeneity}}$ | $P_{\text{between}}$ |
|--------------------------------------|--------------------------|--------------------|------------------------|----------------------|---------------------------------------------------|----------------------|
| <b>All Studies</b>                   | 14                       | 0.89 (0.83 – 0.95) | 0.70 – 1.13            | 0.0118 (0.00 – 0.08) | 47.4%, (10.3 – 69.2),<br>0.01                     | NA                   |
| <b>Sex</b>                           |                          |                    |                        |                      |                                                   | 0.57                 |
| Male                                 | 3                        | 0.85 (0.71 – 1.01) | 0.13 – 5.52            | 0.0139 (0.00 – 1.49) | 62.6%, (0.0 – 89.3)<br>0.07                       |                      |
| Female                               | 5                        | 0.89 (0.85 – 0.94) | 0.83 – 0.97            | 0 (0.00 – 0.12)      | 0%, (0.0 – 79.2)<br>0.6                           |                      |
| <b>Continents</b>                    |                          |                    |                        |                      |                                                   | 0.57                 |
| USA                                  | 9                        | 0.89 (0.82 – 0.96) | 0.70 – 1.13            | 0.0085 (0.00 – 0.06) | 51.5%, (0.0 – 77.3)<br>0.04                       |                      |
| Europe                               | 7                        | 0.83 (0.67 – 1.03) | 0.43 – 1.63            | 0.0568 (0.00 – 1.53) | 44%, (0.0 – 76.4)<br>0.10                         |                      |
| Asia                                 | 2                        | 0.93 (0.74 – 1.16) | NA                     | 0.0208               | 76.8%, (0.0 – 94.7)<br>0.04                       |                      |
| Australia                            | 1                        | 0.98 (0.85 – 1.13) | NA                     | NA                   | NA                                                |                      |
| <b>Follow-up (years)</b>             |                          |                    |                        |                      |                                                   | 0.89                 |
| <10                                  | 6                        | 0.86 (0.60 – 1.24) | 0.25 – 2.94            | 0.1617 (0.01 – 2.75) | 67.6%, (23.2 – 86.4)<br><0.01                     |                      |
| ≥10                                  | 13                       | 0.88 (0.84 – 0.92) | 0.77 – 1.01            | 0.0033 (0.00 – 0.02) | 35.2%, (0.00 – 66.5)<br>0.1                       |                      |
| <b>BMI status (kg/m<sup>2</sup>)</b> |                          |                    |                        |                      |                                                   | 0.47                 |
| BMI<25                               | 3                        | 0.94 (0.76 – 1.15) | 0.15 – 5.84            | 0.0097 (0.00 – 1.10) | 34%, (0.0 – 78.5)<br>0.22                         |                      |
| BMI≥25                               | 3                        | 0.86 (0.80 – 0.93) | 0.73 – 1.02            | 0 (0.00 – 0.00)      | 0%, (0.0 – 84.7)<br>0.97                          |                      |

BMI: Body mass index; CI: Confidence interval; HR: Hazard ratio; NA: Not applicable

**Figure S4. Funnel plot**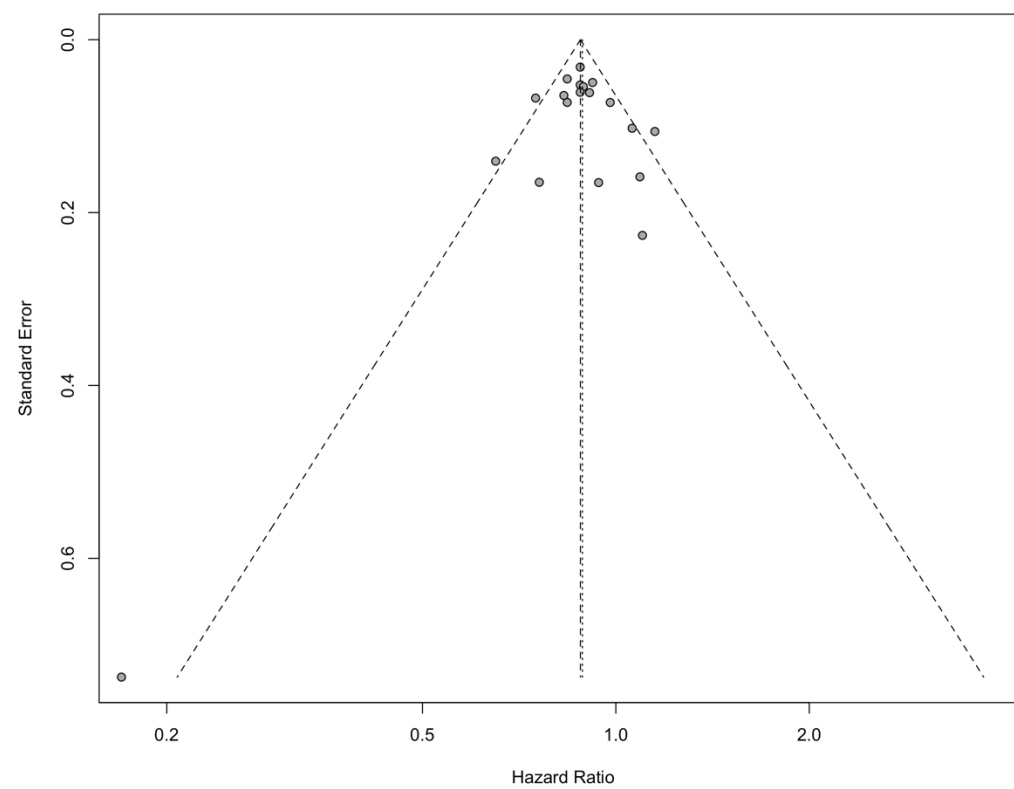



### Figure S5. GRADE Certainty of evidence

**Question:** High adherence to the MD compared to low adherence for type 2 diabetes mellitus prevention

| Certainty assessment |                        |              |                      |                      |             |                      | № of patients            |                  | Effect                                                   |                                                       | Certainty        | Importance |
|----------------------|------------------------|--------------|----------------------|----------------------|-------------|----------------------|--------------------------|------------------|----------------------------------------------------------|-------------------------------------------------------|------------------|------------|
| № of studies         | Study design           | Risk of bias | Inconsistency        | Indirectness         | Imprecision | Other considerations | high adherence to the MD | low adherence    | Relative (95% CI)                                        | Absolute (95% CI)                                     |                  |            |
| Diabetes risk (HR)   |                        |              |                      |                      |             |                      |                          |                  |                                                          |                                                       |                  |            |
| 18                   | non-randomised studies | not serious  | serious <sup>a</sup> | serious <sup>b</sup> | not serious | none                 | 100 participants         | 100 participants | <b>HR 0.89</b><br>(0.83 to 0.95)<br>[Diabetes risk (HR)] | <b>0 fewer per 1,000</b><br>(from 0 fewer to 0 fewer) | ⊕⊕○○<br>Low      |            |
|                      |                        |              |                      |                      |             |                      | -                        | -                |                                                          | <b>0 fewer per 1,000</b><br>(from 0 fewer to 0 fewer) |                  |            |
| Diabetes risk (OR)   |                        |              |                      |                      |             |                      |                          |                  |                                                          |                                                       |                  |            |
| 5                    | non-randomised studies | not serious  | not serious          | serious              | not serious | none                 | 100 participants         | 100 participants | <b>OR 0.82</b><br>(0.72 to 0.93)                         | <b>0 fewer per 1,000</b><br>(from 0 fewer to 0 fewer) | ⊕⊕⊕○<br>Moderate |            |
|                      |                        |              |                      |                      |             |                      | -                        | -                |                                                          | <b>0 fewer per 1,000</b><br>(from 0 fewer to 0 fewer) |                  |            |

**CI:** confidence interval; **HR:** hazard Ratio; **OR:** odds ratio

#### Explanations

a. No overlap of confidence intervals between studies. Also, the point estimates of the included studies were not similar

b. Not same populations and MD adherence tools

## References

1. Abiemo, E.E.; Alonso, A.; Nettleton, J.A.; Steffen, L.M.; Bertoni, A.G.; Jain, A.; Lutsey, P.L. Relationships of the Mediterranean Dietary Pattern with Insulin Resistance and Diabetes Incidence in the Multi-Ethnic Study of Atherosclerosis (MESA). *Br J Nutr* **2013**, *109*, 1490–1497, doi:10.1017/S0007114512003339.
2. Ahmad, S.; Demler, O.V.; Sun, Q.; Moorthy, M.V.; Li, C.; Lee, I.-M.; Ridker, P.M.; Manson, J.E.; Hu, F.B.; Fall, T.; et al. Association of the Mediterranean Diet With Onset of Diabetes in the Women's Health Study. *JAMA Netw Open* **2020**, *3*, e2025466, doi:10.1001/jamanetworkopen.2020.25466.
3. André, P.; Proctor, G.; Driollet, B.; Garcia-Esquinas, E.; Lopez-Garcia, E.; Gomez-Cabrero, D.; Neyraud, E.; Rodriguez-Artalejo, F.; Morzel, M.; Féart, C. The Role of Overweight in the Association between the Mediterranean Diet and the Risk of Type 2 Diabetes Mellitus: A Mediation Analysis among 21 585 UK Biobank Participants. *International Journal of Epidemiology* **2020**, *49*, 1582–1590, doi:10.1093/ije/dyaa103.
4. Bantle, A.E.; Chow, L.S.; Steffen, L.M.; Wang, Q.; Hughes, J.; Durant, N.H.; Ingram, K.H.; Reis, J.P.; Schreiner, P.J. Association of Mediterranean Diet and Cardiorespiratory Fitness with the Development of Pre-Diabetes and Diabetes: The Coronary Artery Risk Development in Young Adults (CARDIA) Study. *BMJ Open Diab Res Care* **2016**, *4*, e000229, doi:10.1136/bmjdr-2016-000229.
5. Brunner, E.J.; Mosdøl, A.; Witte, D.R.; Martikainen, P.; Stafford, M.; Shipley, M.J.; Marmot, M.G. Dietary Patterns and 15-y Risks of Major Coronary Events, Diabetes, and Mortality. *The American Journal of Clinical Nutrition* **2008**, *87*, 1414–1421, doi:10.1093/ajcn/87.5.1414.
6. Cabrera de León, A.; Domínguez Coello, S.; Almeida González, D.; Brito Díaz, B.; del Castillo Rodríguez, J.C.; González Hernández, A.; Aguirre-Jaime, A.; del Cristo Rodríguez Pérez, M. Impaired Fasting Glucose, Ancestry and Waist-to-Height Ratio: Main Predictors of Incident Diagnosed Diabetes in the Canary Islands: Predictors of Diabetes in the Canary Islands. *Diabetic Medicine* **2012**, *29*, 399–403, doi:10.1111/j.1464-5491.2011.03420.x.
7. Chen, G.-C.; Koh, W.-P.; Neelakantan, N.; Yuan, J.-M.; Qin, L.-Q.; van Dam, R.M. Diet Quality Indices and Risk of Type 2 Diabetes Mellitus. *American Journal of Epidemiology* **2018**, *187*, 2651–2661, doi:10.1093/aje/kwy183.
8. de Koning, L.; Chiuve, S.E.; Fung, T.T.; Willett, W.C.; Rimm, E.B.; Hu, F.B. Diet-Quality Scores and the Risk of Type 2 Diabetes in Men. *Diabetes Care* **2011**, *34*, 1150–1156, doi:10.2337/dc10-2352.
9. Esfandiari, Z.; Hosseini-Esfahani, F.; Mirmiran, P.; Azizi, F. Diet Quality Indices and the Risk of Type 2 Diabetes in the Tehran Lipid and Glucose Study. *BMJ Open Diab Res Care* **2022**, *10*, e002818, doi:10.1136/bmjdr-2022-002818.
10. Galbete, C.; Kröger, J.; Jannasch, F.; Iqbal, K.; Schwingshackl, L.; Schwedhelm, C.; Weikert, C.; Boeing, H.; Schulze, M.B. Nordic Diet, Mediterranean Diet, and the Risk of Chronic Diseases: The EPIC-Potsdam Study. *BMC Med* **2018**, *16*, 99, doi:10.1186/s12916-018-1082-y.

11. Glenn, A.J.; Li, J.; Lo, K.; Jenkins, D.J.A.; Boucher, B.A.; Hanley, A.J.; Kendall, C.W.C.; Shadyab, A.H.; Tinker, L.F.; Chessler, S.D.; et al. The Portfolio Diet and Incident Type 2 Diabetes: Findings From the Women's Health Initiative Prospective Cohort Study. *Diabetes Care* **2023**, *46*, 28–37, doi:10.2337/dc22-1029.
12. Hlaing-Hlaing, H.; Dolja-Gore, X.; Tavener, M.; James, E.L.; Hodge, A.M.; Hure, A.J. Diet Quality and Incident Non-Communicable Disease in the 1946–1951 Cohort of the Australian Longitudinal Study on Women's Health. *IJERPH* **2021**, *18*, 11375, doi:10.3390/ijerph182111375.
13. Hodge, A.M.; Karim, M.N.; Hébert, J.R.; Shivappa, N.; de Courten, B. Association between Diet Quality Indices and Incidence of Type 2 Diabetes in the Melbourne Collaborative Cohort Study. *Nutrients* **2021**, *13*, 4162, doi:10.3390/nu13114162.
14. The InterAct Consortium Mediterranean Diet and Type 2 Diabetes Risk in the European Prospective Investigation Into Cancer and Nutrition (EPIC) Study. *Diabetes Care* **2011**, *34*, 1913–1918, doi:10.2337/dc11-0891.
15. Jacobs, S.; Harmon, B.E.; Boushey, C.J.; Morimoto, Y.; Wilkens, L.R.; Le Marchand, L.; Kröger, J.; Schulze, M.B.; Kolonel, L.N.; Maskarinec, G. A Priori-Defined Diet Quality Indexes and Risk of Type 2 Diabetes: The Multiethnic Cohort. *Diabetologia* **2015**, *58*, 98–112, doi:10.1007/s00125-014-3404-8.
16. Khalili-Moghadam, S.; Mirmiran, P.; Bahadoran, Z.; Azizi, F. The Mediterranean Diet and Risk of Type 2 Diabetes in Iranian Population. *Eur J Clin Nutr* **2019**, *73*, 72–78, doi:10.1038/s41430-018-0336-2.
17. Koloverou, E.; Esposito, K.; Giugliano, D.; Panagiotakos, D. The Effect of Mediterranean Diet on the Development of Type 2 Diabetes Mellitus: A Meta-Analysis of 10 Prospective Studies and 136,846 Participants. *Metabolism* **2014**, *63*, 903–911, doi:10.1016/j.metabol.2014.04.010.
18. Martínez-González, M.Á.; Fuente-Arrillaga, C. de la; Nunez-Cordoba, J.M.; Basterra-Gortari, F.J.; Beunza, J.J.; Vazquez, Z.; Benito, S.; Tortosa, A.; Bes-Rastrollo, M. Adherence to Mediterranean Diet and Risk of Developing Diabetes: Prospective Cohort Study. *BMJ* **2008**, *336*, 1348–1351, doi:10.1136/bmj.39561.501007.BE.
19. Mozaffarian, D.; Marfisi, R.; Levantesi, G.; Silletta, M.G.; Tavazzi, L.; Tognoni, G.; Valagussa, F.; Marchioli, R. Incidence of New-Onset Diabetes and Impaired Fasting Glucose in Patients with Recent Myocardial Infarction and the Effect of Clinical and Lifestyle Risk Factors. *The Lancet* **2007**, *370*, 667–675, doi:10.1016/S0140-6736(07)61343-9.
20. O'Connor, L.E.; Hu, E.A.; Steffen, L.M.; Selvin, E.; Rebholz, C.M. Adherence to a Mediterranean-Style Eating Pattern and Risk of Diabetes in a U.S. Prospective Cohort Study. *Nutr. Diabetes* **2020**, *10*, 8, doi:10.1038/s41387-020-0113-x.
21. Ortega, E.; Franch, J.; Castell, C.; Goday, A.; Ribas-Barba, L.; Soriguer, F.; Vendrell, J.; Casamitjana, R.; Bosch-Comas, A.; Bordiú, E.; et al. Mediterranean Diet Adherence in Individuals with Prediabetes and Unknown Diabetes: The Di@bet.Es Study. *Ann Nutr Metab* **2013**, *62*, 339–346, doi:10.1159/000346553.

22. Ramezan, M.; Asghari, G.; Mirmiran, P.; Tahmasebinejad, Z.; Azizi, F. Mediterranean Dietary Patterns and Risk of Type 2 Diabetes in the Islamic Republic of Iran. *East Mediterr Health J* **2019**, *25*, 896–904, doi:10.26719/emhj.19.035.
23. Rossi, M.; Turati, F.; Lagiou, P.; Trichopoulos, D.; Augustin, L.S.; La Vecchia, C.; Trichopoulou, A. Mediterranean Diet and Glycaemic Load in Relation to Incidence of Type 2 Diabetes: Results from the Greek Cohort of the Population-Based European Prospective Investigation into Cancer and Nutrition (EPIC). *Diabetologia* **2013**, *56*, 2405–2413, doi:10.1007/s00125-013-3013-y.
24. Tison, S.E.; Shikany, J.M.; Long, D.L.; Carson, A.P.; Cofield, S.S.; Pearson, K.E.; Howard, G.; Judd, S.E. Differences in the Association of Select Dietary Measures With Risk of Incident Type 2 Diabetes. *Diabetes Care* **2022**, *45*, 2602–2610, doi:10.2337/dc22-0217.
25. Tobias, D.K.; Hu, F.B.; Chavarro, J.; Rosner, B.; Mozaffarian, D.; Zhang, C. Healthful Dietary Patterns and Type 2 Diabetes Mellitus Risk Among Women With a History of Gestational Diabetes Mellitus. *Arch Intern Med* **2012**, *172*, 1566, doi:10.1001/archinternmed.2012.3747.
26. Brunner, E.J.; Mosdøl, A.; Witte, D.R.; Martikainen, P.; Stafford, M.; Shipley, M.J.; Marmot, M.G. Dietary Patterns and 15-y Risks of Major Coronary Events, Diabetes, and Mortality. *The American Journal of Clinical Nutrition* **2008**, *87*, 1414–1421, doi:10.1093/ajcn/87.5.1414.
27. de Koning, L.; Chiuve, S.E.; Fung, T.T.; Willett, W.C.; Rimm, E.B.; Hu, F.B. Diet-Quality Scores and the Risk of Type 2 Diabetes in Men. *Diabetes Care* **2011**, *34*, 1150–1156, doi:10.2337/dc10-2352.
28. Koloverou, E.; Panagiotakos, D.B.; Pitsavos, C.; Chrysohou, C.; Georgousopoulou, E.N.; Grekas, A.; Christou, A.; Chatzigeorgiou, M.; Skoumas, I.; Tousoulis, D.; et al. Adherence to Mediterranean Diet and 10-Year Incidence (2002–2012) of Diabetes: Correlations with Inflammatory and Oxidative Stress Biomarkers in the ATTICA Cohort Study: Mediterranean Diet and Diabetes. *Diabetes Metab Res Rev* **2016**, *32*, 73–81, doi:10.1002/dmrr.2672.
29. Martínez-González, M.A.; Fernández-Jarne, E.; Serrano-Martínez, M.; Martí, A.; Martínez, J.A.; Martín-Moreno, J.M. Mediterranean Diet and Reduction in the Risk of a First Acute Myocardial Infarction: An Operational Healthy Dietary Score. *Eur J Nutr* **2002**, *41*, 153–160, doi:10.1007/s00394-002-0370-6.
